# Supplementary material for: Impact of Ocean Acidification on the Gut Histopathology and Intestinal Microflora of Exopalaemon carinicauda
Source: MDPI journal article supplement (doi:10.3390/ani13203299), 2023-10-23
Supplement: s1 [file s1]

## Supplementary Material

### **Impact of ocean acidification on the gut histopathology and intestinal microflora of *Exopalaemon carinicauda***

**Table S1:** Sequencing results of different samples.

| Sample | RawPE  | Combined | Qualified | Nochime | Base(nt) | Avglen(nt) | GC     | Q20    | Q30    |
|--------|--------|----------|-----------|---------|----------|------------|--------|--------|--------|
| CONT 1 | 128722 | 117480   | 115007    | 108659  | 45328305 | 417.16     | 52.12% | 97.11% | 91.21% |
| CONT 2 | 116631 | 104027   | 101312    | 86412   | 36597758 | 423.53     | 52.44% | 96.08% | 89.05% |
| CONT 3 | 120815 | 108940   | 106520    | 89172   | 37532657 | 420.90     | 52.52% | 96.58% | 90.05% |
| CONT 4 | 130199 | 126525   | 123730    | 120899  | 49139609 | 406.45     | 53.58% | 98.22% | 94.18% |
| CONT 5 | 123087 | 109827   | 107158    | 95694   | 40283731 | 420.96     | 52.94% | 96.74% | 90.41% |
| CONT 6 | 128486 | 115174   | 111838    | 104209  | 44336096 | 425.45     | 50.98% | 96.23% | 89.50% |
| AC74 1 | 126051 | 112353   | 109545    | 98034   | 41113585 | 419.38     | 53.00% | 96.68% | 90.34% |
| AC74 2 | 128229 | 116329   | 113653    | 92914   | 38489246 | 414.25     | 52.98% | 96.87% | 90.64% |
| AC74 3 | 130822 | 117451   | 114852    | 98041   | 41011902 | 418.31     | 52.43% | 96.98% | 90.92% |
| AC74 4 | 124685 | 110650   | 107854    | 100047  | 42147755 | 421.28     | 52.55% | 96.43% | 89.84% |
| AC74 5 | 128518 | 112316   | 109584    | 97639   | 41212080 | 422.09     | 52.90% | 96.55% | 89.99% |
| AC74 6 | 86732  | 78571    | 76592     | 70197   | 29404904 | 418.89     | 52.90% | 97.02% | 91.11% |
| AC70 1 | 127867 | 115067   | 112521    | 98933   | 41301690 | 417.47     | 53.25% | 96.91% | 90.75% |
| AC70 2 | 124632 | 112403   | 109743    | 96692   | 40498228 | 418.84     | 52.85% | 96.81% | 90.69% |

|        |        |        |        |        |          |        |        |        |        |
|--------|--------|--------|--------|--------|----------|--------|--------|--------|--------|
| AC70 3 | 126236 | 114266 | 111738 | 104513 | 44388608 | 424.72 | 52.33% | 96.88% | 90.71% |
| AC70 4 | 115955 | 104521 | 102192 | 94685  | 39718497 | 419.48 | 52.60% | 96.98% | 91.07% |
| AC70 5 | 61395  | 55297  | 54040  | 49013  | 20500355 | 418.26 | 53.75% | 97.11% | 91.39% |

Notes on Supplementary Table S1.

RawPE: remove the sequence of barcode and primer; Combined: a spliced sequence; Qualified: the sequence after quality control is completed; Nochime: sequence after chimera removal.

Supplemental figure

Figure S1. Survival rate of *Exopalaemon carinicauda* in control group (pH8.1) and experimental group (pH7.4 and 7.0).

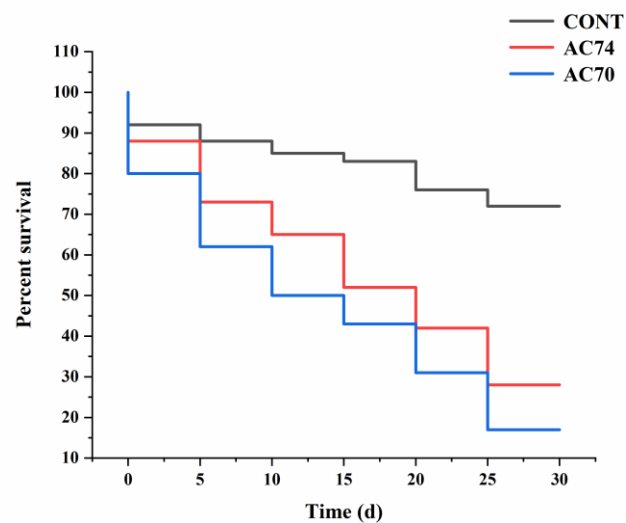

**Figure S1.** The vertical ladder diagram shows the survival rates of three groups (CONT, AC74 and AC70).
